# Supplementary material for: Oxovanadium(iv/v) lawsone-based complexes: synthesis, characterization, DFT studies, and multifunctional biological activities
Source: Royal Society of Chemistry journal article supplement (doi:10.1039/d6ra02275h), 2026-05-26
Supplement: d6ra02275h1.pdf [file d6ra02275h1.pdf]

## Electronic supplementary materials

### Oxovanadium(IV/V) Lawsonsone-based complexes: Synthesis, characterization, DFT Studies, and multifunctional biological activities

Islam M. Elnabky<sup>1</sup>, Mohamed Aboelnga<sup>1,2</sup>, Heba A. Sahyon<sup>3</sup>, Ahmed M. El-Hendawy<sup>1</sup> and Shadia A. Elsayed<sup>1,\*</sup>

<sup>1</sup>Chemistry Department, Faculty of Science, Damietta University, New Damietta, Egypt

<sup>2</sup>King Salman International University, Faculty of Basic Sciences, Ras Sudr, 46612, South Sinai, Egypt

<sup>3</sup>Chemistry Department, Faculty of Science, Kafr Elsheikh University, Kafr Elsheikh, Egypt

\*Corresponding authors:

Shadia A. Elsayed. Email: [shadia.elsayed@du.edu.eg](mailto:shadia.elsayed@du.edu.eg), [shadia.a.elsayed@gmail.com](mailto:shadia.a.elsayed@gmail.com)

#### Contents

#### 1. FTIR spectra

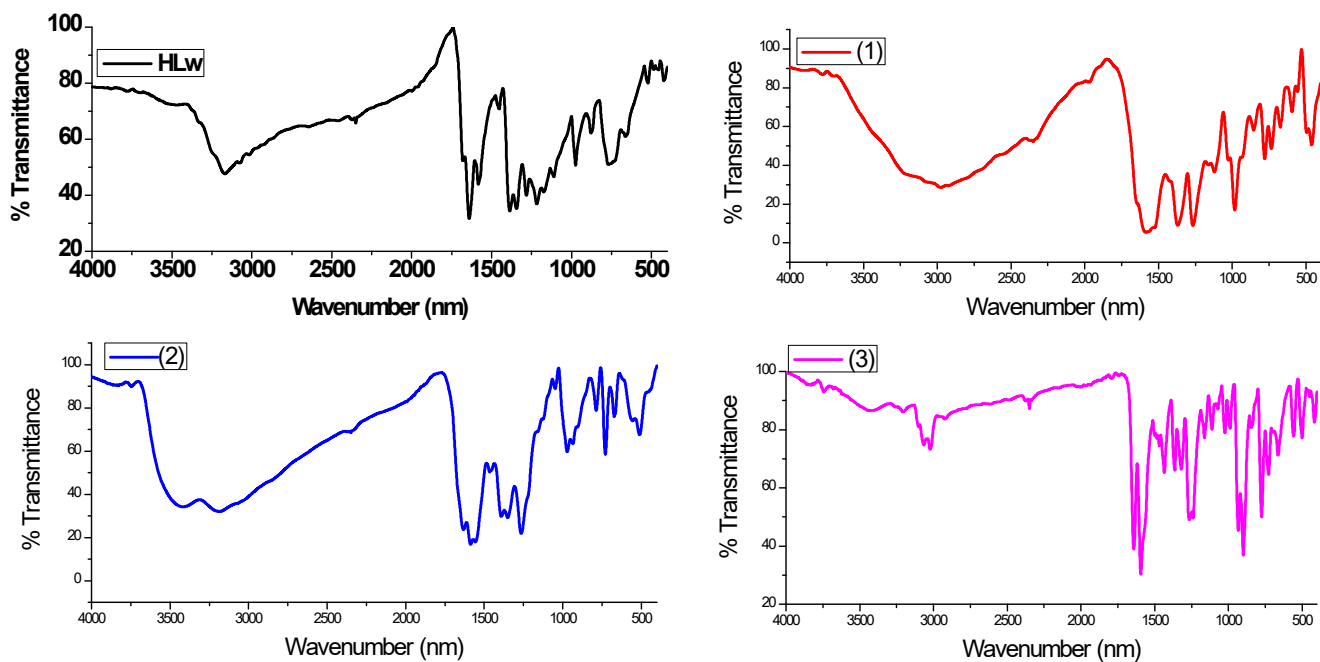

Fig. S1: FTIR spectra of the ligand (HLw) and its complexes (1 – 3)

## Electronic supplementary materials

### 2. NMR spectra

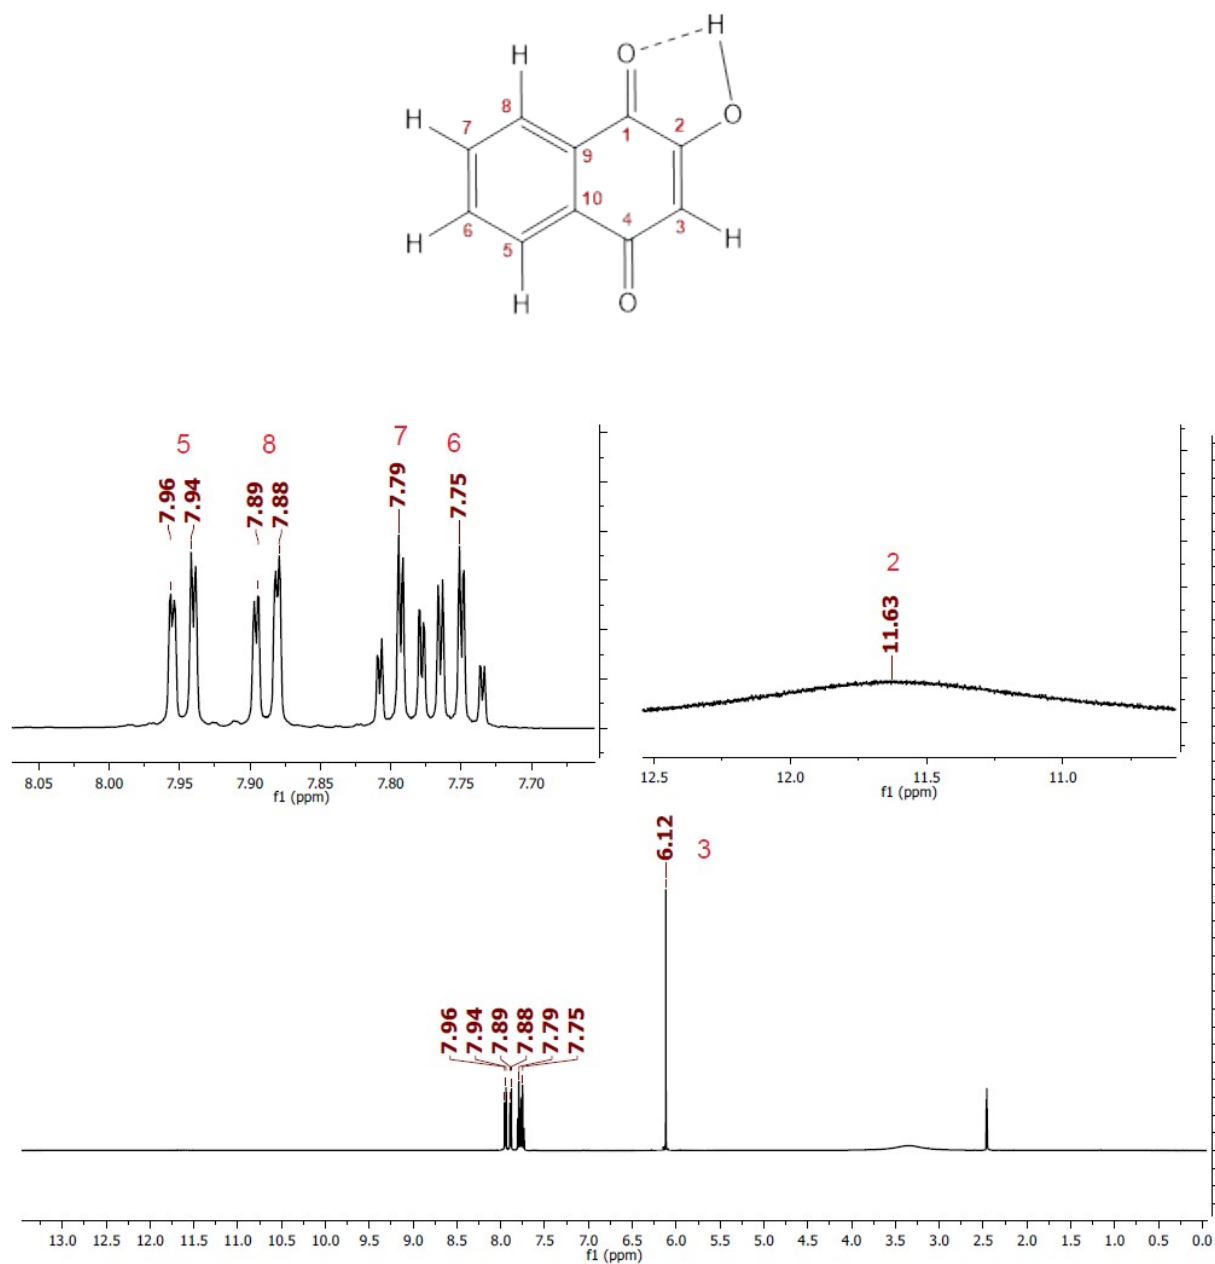

**Fig. S2a:**  $^1\text{H}$ NMR spectrum of Lawsone (HLw) in  $\text{DMSO-d}_6$  (400 MHz).

## Electronic supplementary materials

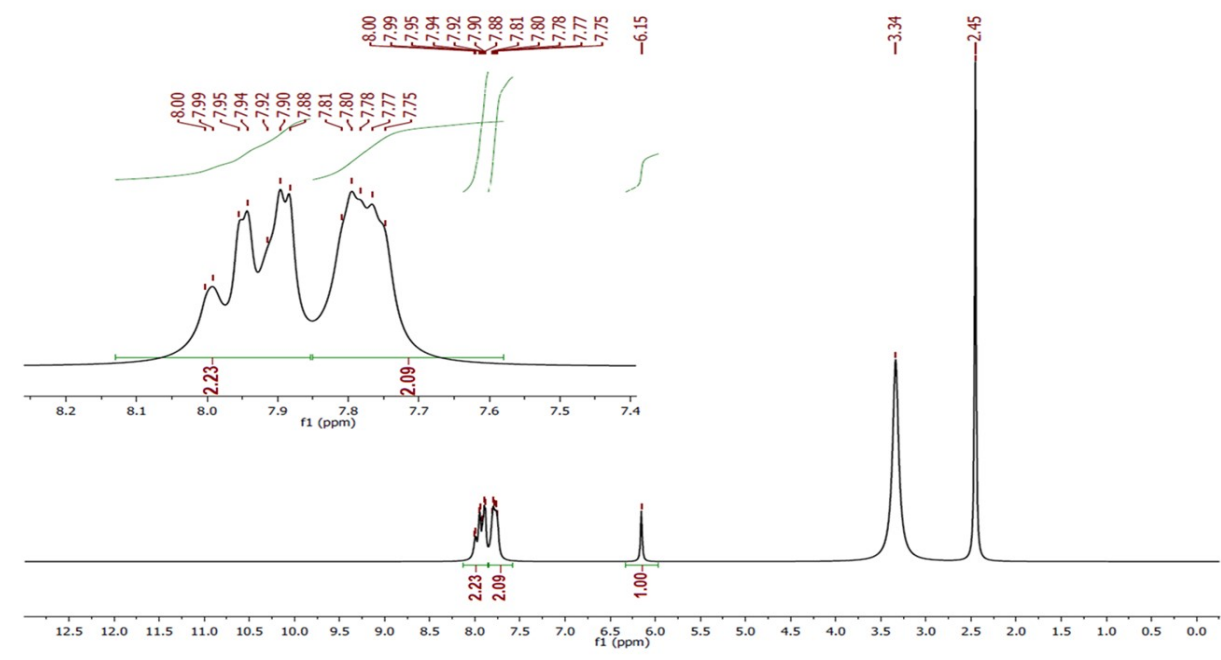

Fig. S2b:  $^1\text{H}$ NMR spectrum of Complex (2) in  $\text{DMSO-d}_6$  (400 MHz).

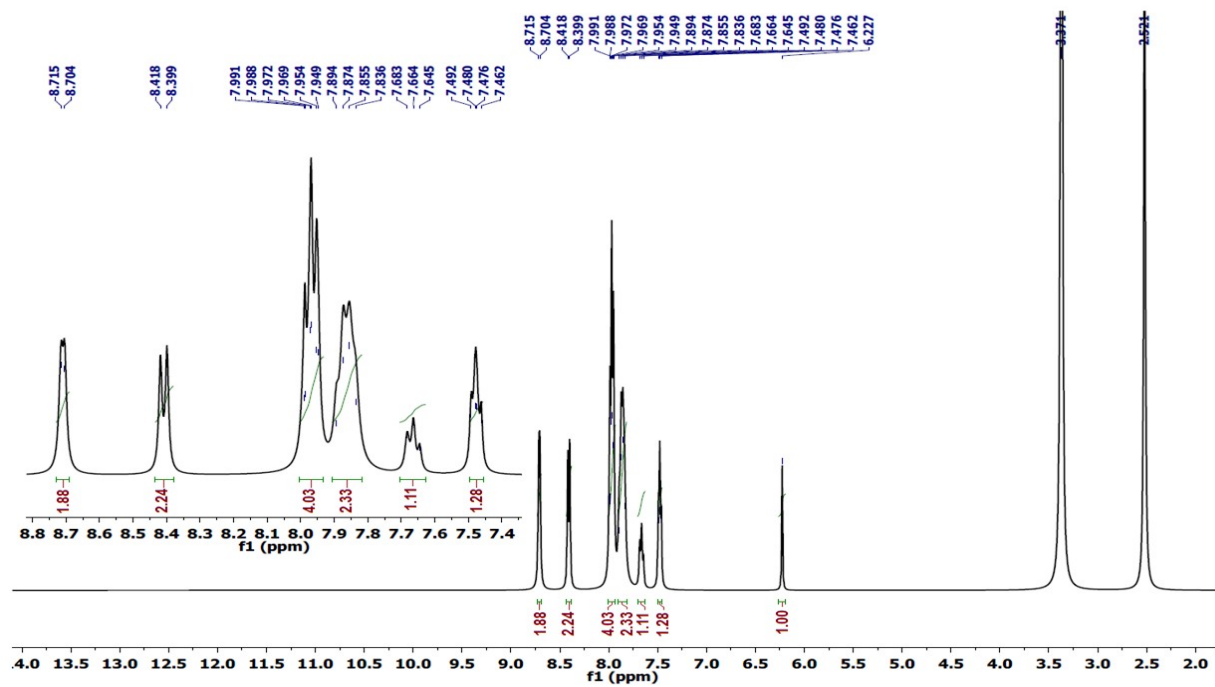

Fig. S2C:  $^1\text{H}$ NMR spectrum of Complex (3) in  $\text{DMSO-d}_6$  (400 MHz).

## Electronic supplementary materials

### 3. ESI-MS spectra

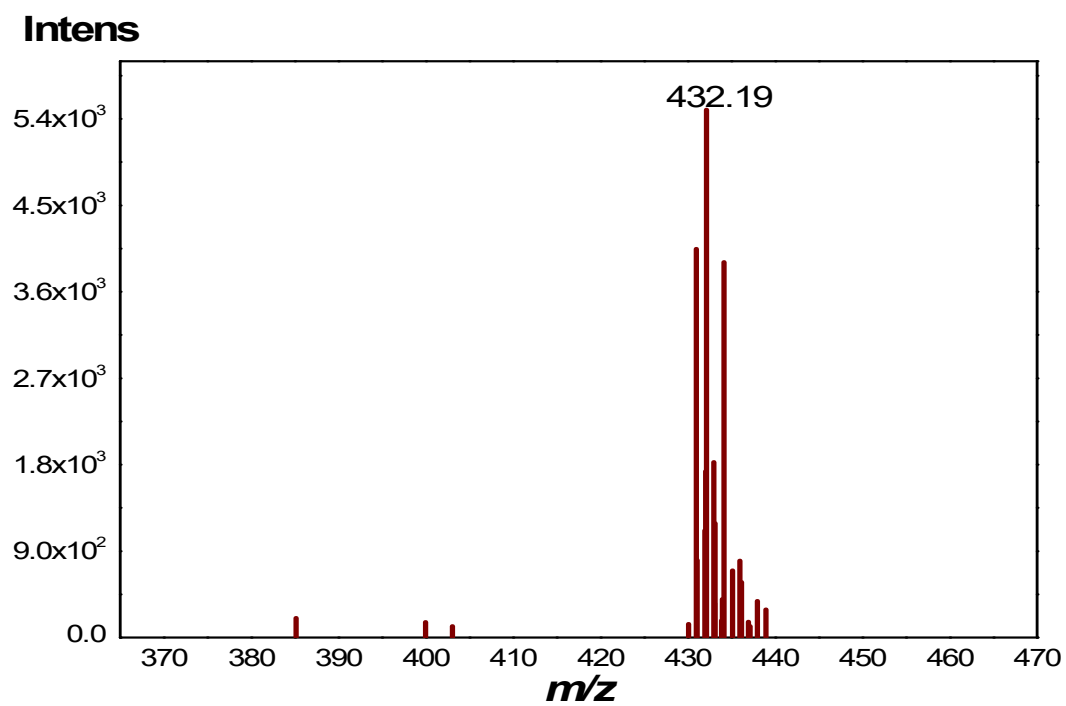

## Electronic supplementary materials

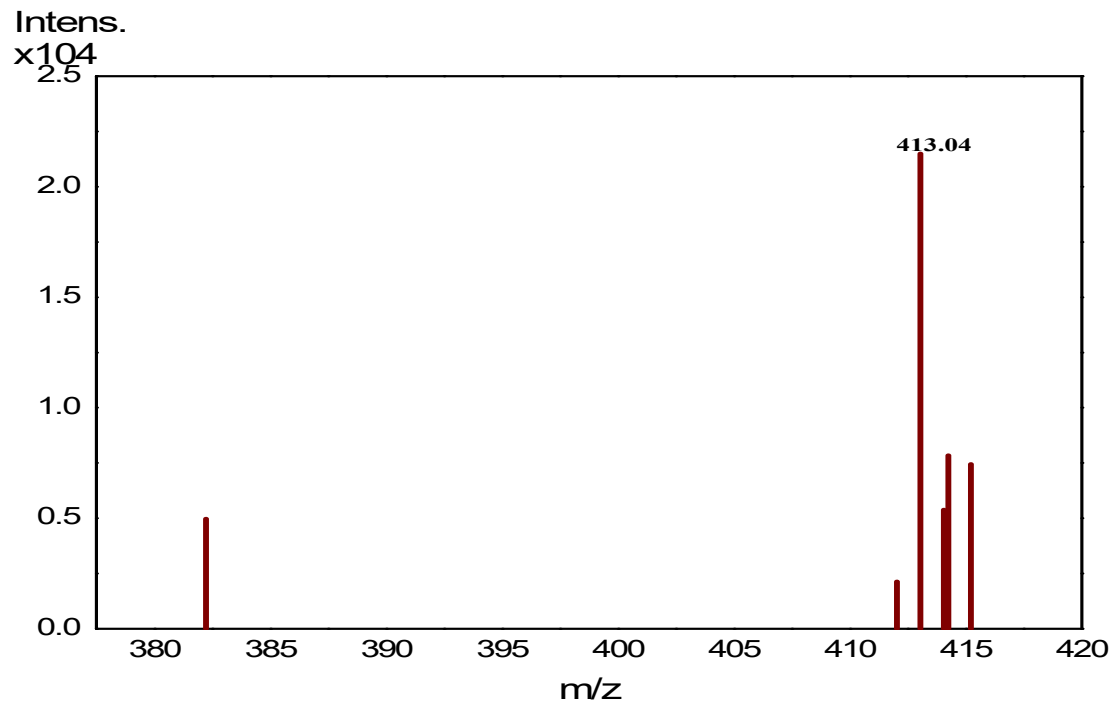

**Fig.S3a.** ESI-MS spectrum of **complex (1)**

**Fig.S3b.** ESI-MS spectrum of **complex (2)**

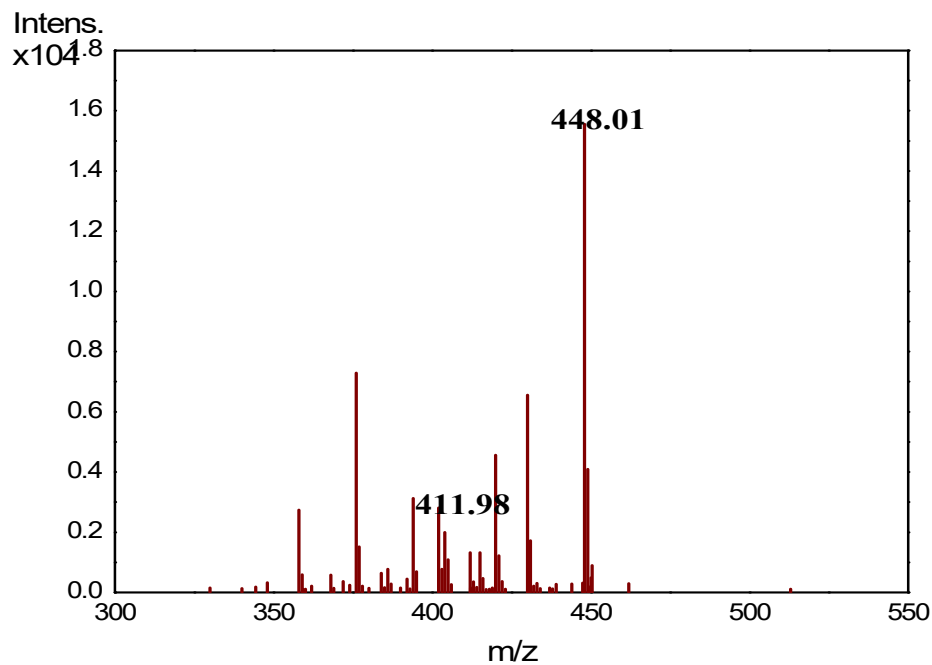

**Fig.S3**  
**c.** ESI-  
MS  
spectru  
m of  
**compl**  
**ex (3)**

## Electronic supplementary materials

### 4. TGA diagrams :

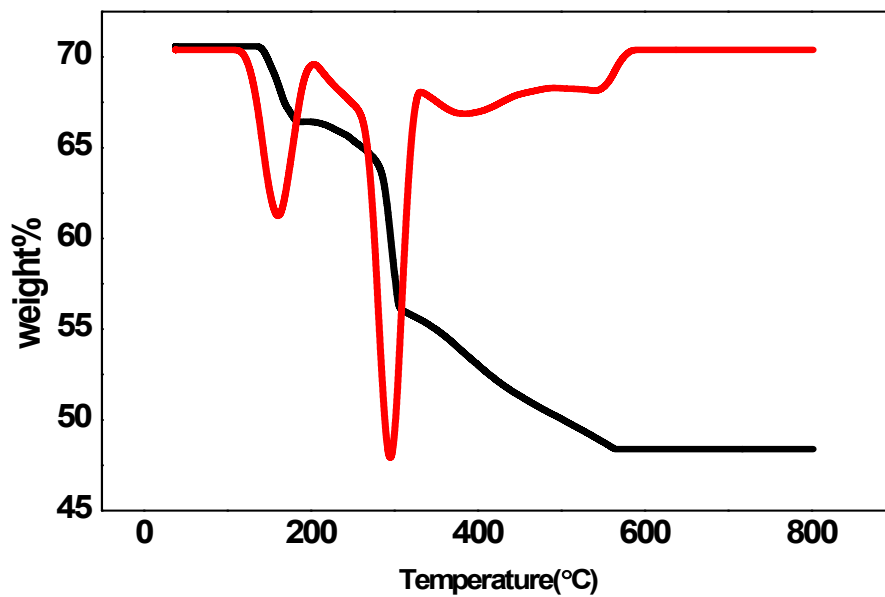

Fig. S4a:TGA of [VO(Lw)<sub>2</sub>(H<sub>2</sub>O)].H<sub>2</sub>O (1)

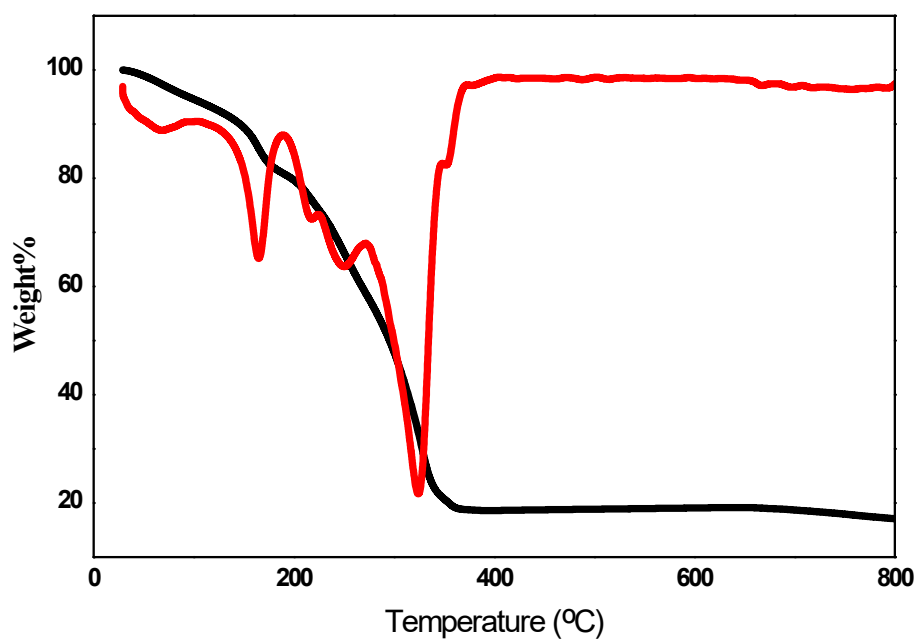

Fig. S4b:TGA of [VO(Lw)<sub>2</sub>Cl].H<sub>2</sub>O (2)

## Electronic supplementary materials

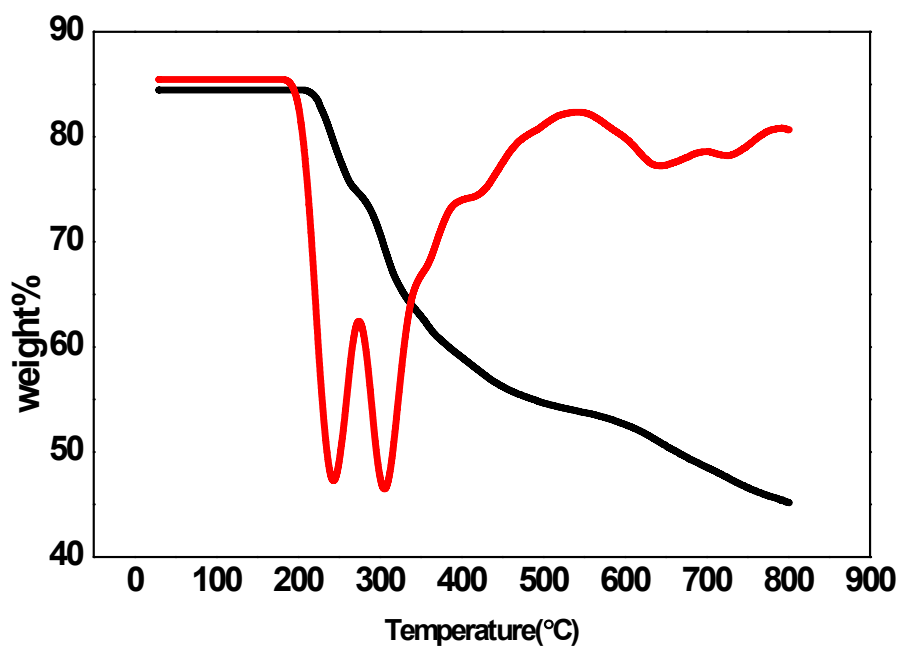

Fig. S4c:TGA of  $[\text{VO}_2(\text{Lw})(\text{bpy})]$  (3)

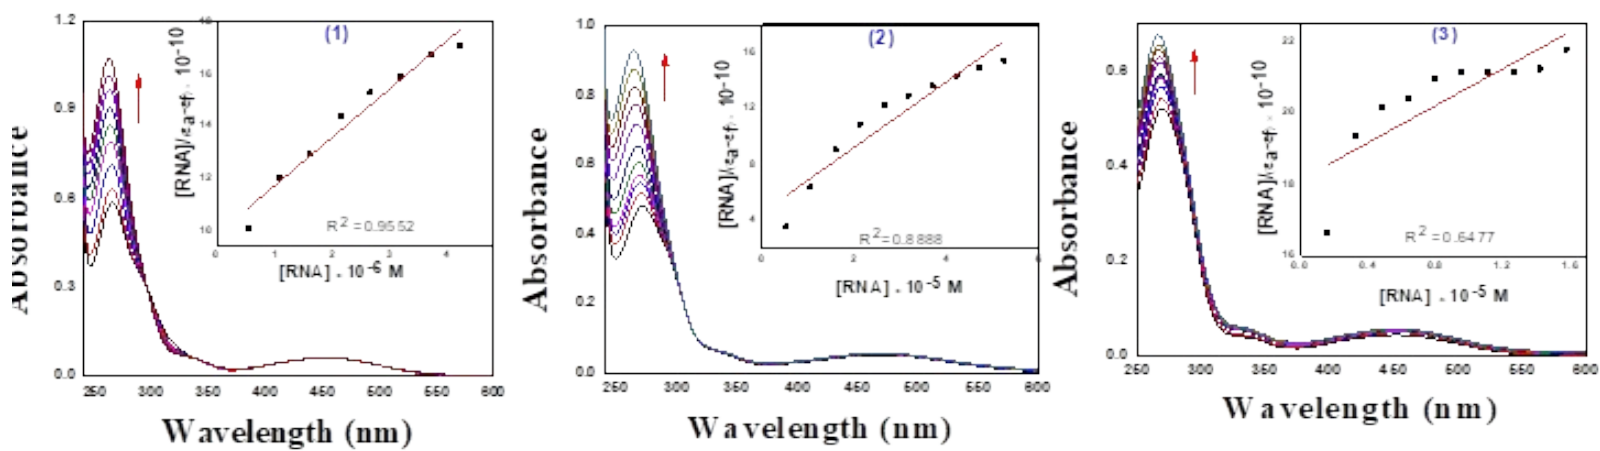

## 5. RNA absorption study

## Electronic supplementary materials

**Fig.S5:** Electronic spectral changes of the complexes (1–3) (50  $\mu\text{M}$ ) before and after the addition of (b) tRNA (0 – 100  $\mu\text{M}$ ), in Tris–HCl buffer (pH 7.2)) (inset: Plot of  $[\text{RNA}]$  vs.  $[\text{RNA}] / (\epsilon_a - \epsilon_f)$ )).

### 6. DNA emission Study

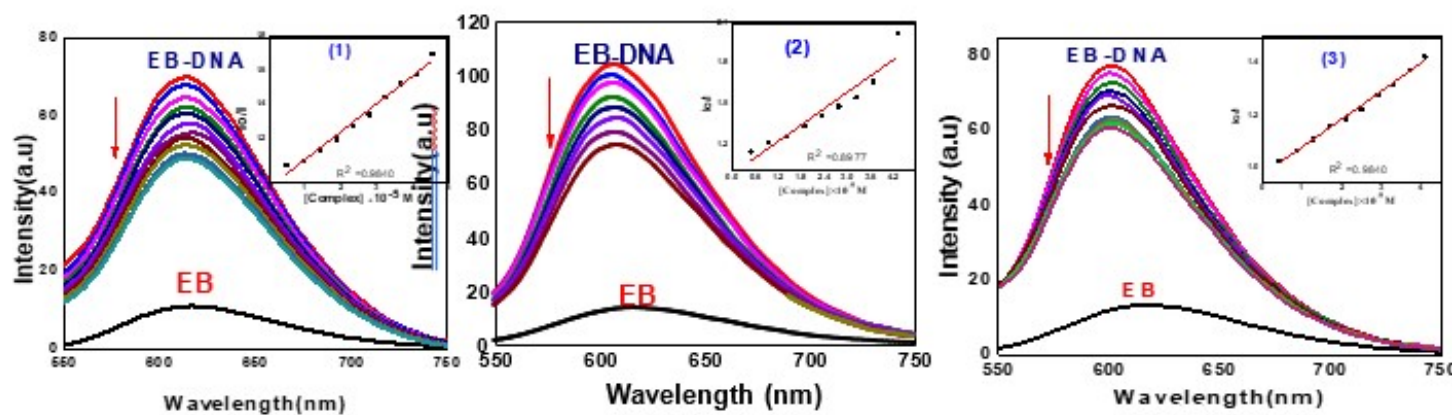

**Fig.S6:** Fluorescence spectra of EB –DNA complex in the presence of different concentrations of the complexes (1-3), (Inset: plots of  $I_0/I$  vs.  $[\text{complex}]$ ).
